# Supplementary material for: Suicide Prevention Videos Developed by and for Adolescents
Source: Atypon-hosted journal article supplement (doi:10.1027/0227-5910/a000696), 2020-05-20
Supplement: 0227-5910_a000696_esm1.pdf [file 0227-5910_a000696_esm1.pdf]

**Electronic Supplementary Material 1**

**Table of Contents**

Project programme .....2

Time schedule..... 5

Script template.....6

Additional recommendations for a successful project implementation..... 8

References .....9

### Project programme

#### **Week 1:** 1<sup>st</sup> & 2<sup>nd</sup> lesson (100 min.)

| Programme                                                                                                                                                                                                                                                                                                                                                                | Time    | Material                                                                                                                                                                                              | Notes                                                                                                                                                                                                                                                                      |
|--------------------------------------------------------------------------------------------------------------------------------------------------------------------------------------------------------------------------------------------------------------------------------------------------------------------------------------------------------------------------|---------|-------------------------------------------------------------------------------------------------------------------------------------------------------------------------------------------------------|----------------------------------------------------------------------------------------------------------------------------------------------------------------------------------------------------------------------------------------------------------------------------|
| <ul style="list-style-type: none"> <li>• introduction of participants and project team</li> </ul>                                                                                                                                                                                                                                                                        | 15 min. |                                                                                                                                                                                                       |                                                                                                                                                                                                                                                                            |
| <ul style="list-style-type: none"> <li>• administrative tasks                             <ul style="list-style-type: none"> <li>○ checking the list of attendees</li> <li>○ distribution and clarification of written informed consent for focus groups</li> </ul> </li> </ul>                                                                                          | 15 min. | <ul style="list-style-type: none"> <li>• list of attendees</li> <li>• written informed consent for focus groups</li> </ul>                                                                            |                                                                                                                                                                                                                                                                            |
| <ul style="list-style-type: none"> <li>• presentation of a project overview</li> </ul>                                                                                                                                                                                                                                                                                   | 20 min. | <ul style="list-style-type: none"> <li>• presentation with project information</li> </ul>                                                                                                             | <ul style="list-style-type: none"> <li>• brief project overview with information on:                             <ul style="list-style-type: none"> <li>○ project idea</li> <li>○ project phases</li> <li>○ time schedule for the following lessons</li> </ul> </li> </ul> |
| <ul style="list-style-type: none"> <li>• part I: <i>Facts on Suicide Quiz</i><sup>1</sup> about basics of suicide prevention:                             <ul style="list-style-type: none"> <li>○ warning signals and symptoms of suicidality</li> <li>○ personal experiences with crisis situation and suicidality</li> <li>○ coping strategies</li> </ul> </li> </ul> | 50 min. | <ul style="list-style-type: none"> <li>• <i>Facts on Suicide Quiz</i><sup>1</sup> (printed)</li> <li>• presentation with information on basics of suicide prevention (digital and printed)</li> </ul> | <ul style="list-style-type: none"> <li>• interactive approach: focus on discussion</li> <li>• slides and presentation with facts on suicide for additional information</li> <li>• handing out slides as handouts</li> </ul>                                                |

**Week 2:** 3<sup>rd</sup> & 4<sup>th</sup> lesson (100 min.)

| Programme                                                                                                                                                                                                                                                                                                                                                                                             | Time    | Material                                                                                                                                                                                              | Notes                                                                                                                                                                                                      |
|-------------------------------------------------------------------------------------------------------------------------------------------------------------------------------------------------------------------------------------------------------------------------------------------------------------------------------------------------------------------------------------------------------|---------|-------------------------------------------------------------------------------------------------------------------------------------------------------------------------------------------------------|------------------------------------------------------------------------------------------------------------------------------------------------------------------------------------------------------------|
| <ul style="list-style-type: none"> <li>• part II: <i>Facts on Suicide Quiz</i><sup>1</sup> about basics of suicide prevention:                             <ul style="list-style-type: none"> <li>○ statistics, numbers, and facts on suicide</li> </ul> </li> </ul>                                                                                                                                  | 50 min. | <ul style="list-style-type: none"> <li>• <i>Facts on Suicide Quiz</i><sup>1</sup> (printed)</li> <li>• presentation with information on basics of suicide prevention (digital and printed)</li> </ul> | <ul style="list-style-type: none"> <li>• focus on information and facts on suicide</li> <li>• following slides and presentation with facts on suicide</li> <li>• handing out slides as handouts</li> </ul> |
| <ul style="list-style-type: none"> <li>• part I: Suicide and the media:                             <ul style="list-style-type: none"> <li>○ harmful and protective roles of media in suicide prevention (<i>Werther</i><sup>2</sup> and <i>Papageno</i><sup>3</sup> effects)</li> <li>○ overview of available media recommendations for safe reporting on suicide<sup>4</sup></li> </ul> </li> </ul> | 50 min. | <ul style="list-style-type: none"> <li>• presentation with information on suicide and the media</li> </ul>                                                                                            | <ul style="list-style-type: none"> <li>• interactive approach: focus on discussion</li> <li>• slides and presentation with suicide and the media for additional information</li> </ul>                     |

**Week 3:** 5<sup>th</sup> & 6<sup>th</sup> lesson (100 min.)

| Programme                                                                                                                                                                                                                                                            | Time    | Material                                                                                                                                                  | Notes                                                                                                                                                                                                                          |
|----------------------------------------------------------------------------------------------------------------------------------------------------------------------------------------------------------------------------------------------------------------------|---------|-----------------------------------------------------------------------------------------------------------------------------------------------------------|--------------------------------------------------------------------------------------------------------------------------------------------------------------------------------------------------------------------------------|
| <ul style="list-style-type: none"> <li>• part II: Suicide and the media:                             <ul style="list-style-type: none"> <li>○ positive examples of suicide awareness videos</li> </ul> </li> </ul>                                                   | 35 min. | <ul style="list-style-type: none"> <li>• presentation with information on suicide and the media</li> <li>• suicide prevention awareness videos</li> </ul> | <ul style="list-style-type: none"> <li>• interactive approach: presentation and discussion of positive examples of suicide awareness videos</li> </ul>                                                                         |
| <ul style="list-style-type: none"> <li>• information on help in crisis in Vienna, Austria for children and adolescents</li> </ul>                                                                                                                                    | 15 min. | <ul style="list-style-type: none"> <li>• list with mental health and crisis intervention centers in Vienna, Austria</li> </ul>                            | <ul style="list-style-type: none"> <li>• list with mental health and crisis intervention centers for the students' videos' final scene</li> </ul>                                                                              |
| <ul style="list-style-type: none"> <li>• information on project details and the video production process:                             <ul style="list-style-type: none"> <li>○ presentation and discussion of the requirements for the videos</li> </ul> </li> </ul> | 40 min. | <ul style="list-style-type: none"> <li>• presentation with information on project details and the video production process</li> </ul>                     | <ul style="list-style-type: none"> <li>• detailed project schedule with information on:                             <ul style="list-style-type: none"> <li>○ equipment for the video production process</li> </ul> </li> </ul> |

|                                                                                                                                                     |         |                                                                                            |                                                                                                                                                                                     |
|-----------------------------------------------------------------------------------------------------------------------------------------------------|---------|--------------------------------------------------------------------------------------------|-------------------------------------------------------------------------------------------------------------------------------------------------------------------------------------|
| <ul style="list-style-type: none"> <li>○ presentation of a detailed project schedule</li> <li>○ discussion of the scripts for the videos</li> </ul> |         | <ul style="list-style-type: none"> <li>● script templates (printed; see p. 6-7)</li> </ul> | <ul style="list-style-type: none"> <li>○ requirements for the videos</li> <li>○ time schedule for the following weeks (see p. 5)</li> <li>○ researcher's contact details</li> </ul> |
| <ul style="list-style-type: none"> <li>● Formation of groups for video production process</li> </ul>                                                | 10 min. |                                                                                            | <ul style="list-style-type: none"> <li>● formation of small groups à 2-3 students</li> </ul>                                                                                        |

**Week 4-19:**

- Students working in groups on the suicide awareness videos:
  - reflection and discussion of the contents of the videos
  - writing the scripts
  - production of the videos
- Supervision, guidance and monitoring of students throughout the production process by the first author of this study

**Week 20:**

- Submission of finalized suicide prevention awareness videos

**Week 21:**

- Conduction of the focus group discussions

**Week 22:**

- Presentation of all finalized suicide prevention awareness videos to the involved school administration, teachers, parents, and other interested students at an evening event at the Medical University of Vienna

**Time schedule**

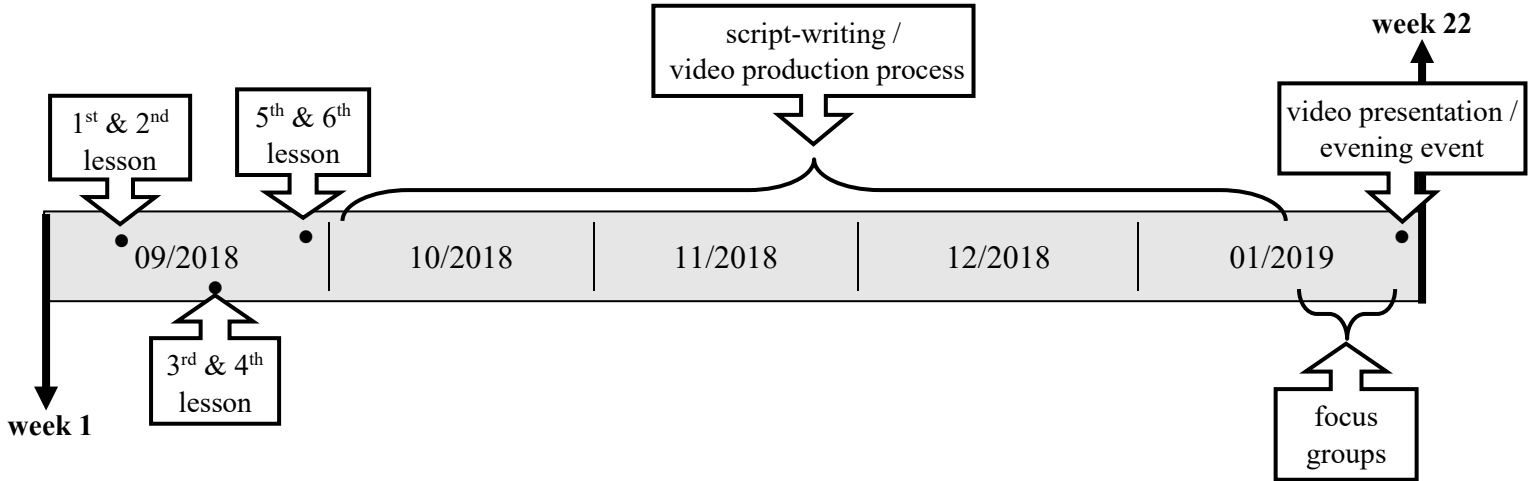

Script template

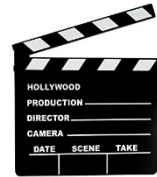

**Names:**

|                                                                                                        |
|--------------------------------------------------------------------------------------------------------|
| Scene Number:                                                                                          |
| Title of the Scene:                                                                                    |
| Film Director:                                                                                         |
| Camera:                                                                                                |
| Film Location:                                                                                         |
| Time (e.g. day, night ...):                                                                            |
| Person portrayed:                                                                                      |
| Plot:                                                                                                  |
| Emotion(s):                                                                                            |
| How are emotions portrayed and conveyed?                                                               |
| Struggles and difficulties portrayed (e.g. warning signals and symptoms of suicidality):               |
| Way out of the crisis / Why and how does the person find hope again?                                   |
| Which help seeking behavior is portrayed (e.g. seeking help from professionals, friends, teacher ...)? |
| Sound / Music:                                                                                         |
| Equipment (e.g. materials, clothes ...):                                                               |
| Time / Length / Duration:                                                                              |

Dialogue / Monologue:

Notes:

**Additional recommendations for a successful project implementation**

- Preparation beforehand:
  - discussing students' opinions and motivation in participating
  - involving the school's management, teachers, and the school's help system
  - defining a procedure in case of psychological distress
  - developing a detailed project schedule and structural frame for the project
  - specifying requirements for the videos' contents
  - developing detailed script-templates for students
  
- Recommendations for the project process:
  - clarifying project details with students at the beginning of the project
  - following the project schedule but adapting the structure flexible according to the students' needs
  - including experts to guide students throughout the entire process (e.g. by supervising them and monitoring and reflecting their ideas and scripts)
  - providing a positive and motivating atmosphere (i.e. by staying in close contact with the students and encouraging them to express themselves freely in a safe environment, treating students like experts, appreciating all finalized videos by presenting them at an event)



**References**

- <sup>1</sup> Voracek, M., Tran, U.S., Sonneck, G. (2008). Psychometric properties of the Revised Facts on Suicide Quiz in Austrian medical and psychological undergraduates. *Death Studies*, 32, 937-86
- <sup>2</sup> Phillips, D. P. (1974). The influence of suggestion on suicide: Substantive and theoretical implications of the Werther effect. *American Sociological Review*, 39, 340-354. doi: 10.2307/2094294.
- <sup>3</sup> Niederkrotenthaler, T., Voracek, M., Herberth, A., Till, B., Strauss, M., Etzersdorfer, E., ... Sonneck, G. (2010). Role of media reports in completed and prevented suicide: Werther v. Papageno effects. *British Journal of Psychiatry*, 197, 234-243. doi: 10.1192/bjp.bp.109.074633.
- <sup>4</sup> World Health Organization (WHO). (2017). *Preventing suicide. A resource for media professionals: update 2017*. Geneva, Switzerland: World Health Organization.
