# Supplementary material for: Suicide Prevention Videos Developed by and for Adolescents
Source: Atypon-hosted journal article supplement (doi:10.1027/0227-5910/a000696), 2020-05-20
Supplement: 0227-5910_a000696_esm3.pdf [file 0227-5910_a000696_esm3.pdf]

### Electronic Supplementary Material 3. Interview Guide

| <b>Themes</b>                                 | <b>Stimulus Question</b>                                                           |
|-----------------------------------------------|------------------------------------------------------------------------------------|
| (1) Experiences During the Production Process | “How did you experience the project?”                                              |
| (2) Learning Effects                          | “What did you learn from this project?”                                            |
| (3) Contents of Videos and Underlying Ideas   | “What are the underlying ideas of your videos?”                                    |
| (4) Opinions on the Videos’ Possible Effects  | “What is your opinion on possible effects the videos may have?”                    |
| (5) Closing                                   | “Please give a statement on what you find the most important aspect to point out.” |
